# Supplementary material
Source: publisher figshare collection journal article supplement (https://sage.figshare.com/ndownloader/files/38788279)
Supplement: Supplementary file 1 [file 38788279]

## Appendix A

Table A1: Summary of Changes to the Juvenile Victimization Questionnaire and Questions Added

| <i>Questions from Juvenile Victimization Questionnaire</i>                                                                                                                                                                                                                                               |                                  |                                                                                                                                                                                                         |                                                                                                                                               |
|----------------------------------------------------------------------------------------------------------------------------------------------------------------------------------------------------------------------------------------------------------------------------------------------------------|----------------------------------|---------------------------------------------------------------------------------------------------------------------------------------------------------------------------------------------------------|-----------------------------------------------------------------------------------------------------------------------------------------------|
| <i>Original Question from JVQ-R2</i>                                                                                                                                                                                                                                                                     | <i>Category of Victimization</i> | <i>Deleted/Added Modified/Unchanged</i>                                                                                                                                                                 | <i>Reason</i>                                                                                                                                 |
| 1. When you were a child, did anyone use force to take something away from you that you were carrying or wearing?                                                                                                                                                                                        | Conventional Crime               | Unchanged                                                                                                                                                                                               | N/A                                                                                                                                           |
| 2. When you were a child, did anyone steal something from you and never give it back? Things like a backpack, money, watch, clothing, bike, stereo, or anything else?                                                                                                                                    | Conventional Crime               | Unchanged                                                                                                                                                                                               | N/A                                                                                                                                           |
| 3. When you were a child, did anyone break or ruin any of your things on purpose?                                                                                                                                                                                                                        | Conventional Crime               | Unchanged                                                                                                                                                                                               | N/A                                                                                                                                           |
| 4. Sometimes people are attacked <u>with</u> sticks, rocks, guns, knives, or other things that would hurt. When you were a child, did anyone hit or attack you on purpose <u>with</u> an object or weapon?<br>Somewhere like: at home, at school, at a store, in a car, on the street, or anywhere else? | Conventional Crime               | Modified (“did anyone” changed to “did other kids, your siblings, or a girlfriend or boyfriend”)                                                                                                        | Wanted to exclude parents as a potential perpetrator to not confound with child maltreatment questions                                        |
| 5. When you were a child, did anyone hit or attack you <u>without</u> using an object or weapon?                                                                                                                                                                                                         | Conventional Crime               | Modified (“did anyone” changed to “did other kids, your siblings, or a girlfriend or boyfriend” and added “Somewhere like: at home, at school, at a store, in a car, on the street, or anywhere else?”) | Wanted to exclude parents as a potential perpetrator to not confound with child maltreatment questions and added potential contexts/locations |

|                                                                                                                                                                                                              |                    |                                                                                                                                                          |                                                                                                                                                                                      |
|--------------------------------------------------------------------------------------------------------------------------------------------------------------------------------------------------------------|--------------------|----------------------------------------------------------------------------------------------------------------------------------------------------------|--------------------------------------------------------------------------------------------------------------------------------------------------------------------------------------|
| 6. When you were a child, did someone start to attack you, but for some reason, it didn't happen? For example, someone helped you or you got away?                                                           | Conventional Crime | Unchanged                                                                                                                                                | N/A                                                                                                                                                                                  |
| 7. When you were a child, did someone threaten to hurt you when you thought they might really do it?                                                                                                         | Conventional Crime | Modified (changed "did someone" to "other kids, siblings, or a girlfriend or boyfriend" and changed "threaten to hurt" to "threaten to physically hurt") | Wanted to exclude parents as a potential perpetrator to not confound with child maltreatment questions and clarified "physically hurt" to not confound with sexual assault questions |
| 8. When a person is kidnapped, it means they were made to go somewhere, like into a car, by someone who they thought might hurt them. When you were a child, did anyone try to kidnap you?                   | Conventional Crime | Modified (Removed 1 <sup>st</sup> sentence that defines kidnapping)                                                                                      | To shorten the question                                                                                                                                                              |
| 9. When you were a child, have you been hit or attacked because of your skin color, religion, or where your family comes from? Because of a physical problem you have? Or because someone said you were gay? | Conventional Crime | Unchanged                                                                                                                                                | N/A                                                                                                                                                                                  |
| 10. Not including spanking on your bottom, when you were a child, did a grown-up in your life hit, beat, kick, or physically hurt you in any way?                                                            | Child Maltreatment | Modified (added "i.e., age 0 to 17" after "when you were a child" and "that did not leave a mark or injury" after "spanking on your bottom")             | Reinforce age range and to make consistent with legal physical abuse definition in the state                                                                                         |
| 11. When you were a child, did you get scared or feel really bad because grown-ups in your life called you names, said mean things to                                                                        | Child Maltreatment | Modified (added "i.e., age 0 to 17" after "when you were a child")                                                                                       | Reinforce age range                                                                                                                                                                  |

|                                                                                                                                                                                                                                                                                                 |                                |                                                                                                                              |                                                                                                                         |
|-------------------------------------------------------------------------------------------------------------------------------------------------------------------------------------------------------------------------------------------------------------------------------------------------|--------------------------------|------------------------------------------------------------------------------------------------------------------------------|-------------------------------------------------------------------------------------------------------------------------|
| you, or said they didn't want you?                                                                                                                                                                                                                                                              |                                |                                                                                                                              |                                                                                                                         |
| 12. When someone is neglected, it means that the grown-ups in their life didn't take care of them the way they should. They might not get them enough food, take them to the doctor when they are sick, or make sure they have a safe place to stay. When you were a child, were you neglected? | Child Maltreatment             | Unchanged                                                                                                                    | N/A                                                                                                                     |
| 13. Sometimes a family fights over where a child should live. When you were a child, did a parent take, keep, or hide you to stop you from being with another parent?                                                                                                                           | Child Maltreatment             | Deleted                                                                                                                      | Confounded with kidnapping question due to child being able to indicate "mother" or "father" as a potential perpetrator |
| 14. Sometimes groups of kids or gangs attack people. When you were a child, did a group of kids or a gang hit, jump, or attack you?                                                                                                                                                             | Peer and Sibling Victimization | Unchanged                                                                                                                    | N/A                                                                                                                     |
| 15. When you were a child, did any kid, even a brother or sister, hit you? Somewhere like: at home, at school, out playing, in a store, or anywhere else?                                                                                                                                       | Peer and Sibling Victimization | Deleted                                                                                                                      | Confounded with question asking about being hit or attacked without a weapon after modification                         |
| 16. When you were a child, did any kids try to hurt your private parts on purpose by hitting or kicking you there?                                                                                                                                                                              | Peer and Sibling Victimization | Modified (changed "did any kids" to "did other kids, your siblings, or a girlfriend or boyfriend")                           | To emphasize other kids could include siblings and significant others                                                   |
| 17. When you were a child, did any kids, even a brother or sister, pick on you by chasing you or grabbing you or by making you do something you didn't want to do?                                                                                                                              | Peer and Sibling Victimization | Modified (changed "did any kids, even a brother or sister" to "did other kids, your siblings, or a girlfriend or boyfriend") | To emphasize other kids could include siblings and significant others                                                   |

|                                                                                                                                                                                                             |                                |                                                                                                                                               |                                                                                                     |
|-------------------------------------------------------------------------------------------------------------------------------------------------------------------------------------------------------------|--------------------------------|-----------------------------------------------------------------------------------------------------------------------------------------------|-----------------------------------------------------------------------------------------------------|
| 18. When you were a child, did you get scared or feel really bad because kids were calling you names, saying mean things to you, or saying they didn't want you around?                                     | Peer and Sibling Victimization | Modified (changed "kids" to "other kids, your siblings, your girlfriend or boyfriend")                                                        | To emphasize other kids could include siblings and significant others                               |
| 19. When you were a child, did a boyfriend or girlfriend or anyone you went on a date with slap or hit you?                                                                                                 | Peer and Sibling Victimization | Unchanged                                                                                                                                     | N/A                                                                                                 |
| 20. When you were a child, did a <u>grown-up you know</u> touch your private parts when they shouldn't have or make you touch their private parts? Or did a <u>grown-up you know</u> force you to have sex? | Sexual Victimization           | Modified (Questions 20 and 21 changed from sexual assault by someone they know vs. don't know to sexual touching vs. rape)                    | Wanted to ask distinct questions about sexual touching vs. rape by grownups                         |
| 21. When you were a child, did a grown-up you did <u>not</u> know touch your private parts when they shouldn't have, make you touch their private parts or force you to have sex?                           | Sexual Victimization           | Modified (Questions 20 and 21 changed from sexual assault by someone they know vs. don't know to sexual touching vs. rape)                    | Wanted to ask distinct questions about sexual touching vs. rape by grownups                         |
| 22. Now think about other kids, like from school, a boy friend or girl friend, or even a brother or sister. When you were a child, did another child or teen make you do sexual things?                     | Sexual Victimization           | Modified (eliminates first sentence and changes "did another child or teen" to "did other kids, your siblings, or a girlfriend or boyfriend") | Remain consistent with wording of other questions that inquire about acts perpetrated by other kids |
| 23. When you were a child, did anyone <u>try</u> to force you to have sex; that is, sexual intercourse of any kind, even if it didn't happen?                                                               | Sexual Victimization           | Modified (changed "did anyone" to "did other kids, your siblings, or a boyfriend or girlfriend")                                              | Eliminates confounding with asking about if a grownup tried to force them to have sex               |
| 24. When you were a child, did anyone make you look at their private parts by using force or surprise, or by "flashing" you?                                                                                | Sexual Victimization           | Unchanged                                                                                                                                     | N/A                                                                                                 |

|                                                                                                                                                                                                                                                |                                       |                                                                                                                                                              |                                                                                                                                                                |
|------------------------------------------------------------------------------------------------------------------------------------------------------------------------------------------------------------------------------------------------|---------------------------------------|--------------------------------------------------------------------------------------------------------------------------------------------------------------|----------------------------------------------------------------------------------------------------------------------------------------------------------------|
| 25. When you were a child, did anyone hurt your feelings by saying or writing something sexual about you or your body?                                                                                                                         | Sexual Victimization                  | Unchanged                                                                                                                                                    | N/A                                                                                                                                                            |
| 26. When you were a child, did you do sexual things with anyone 18 or older, even things you both wanted?                                                                                                                                      | Sexual Victimization                  | Deleted                                                                                                                                                      | Based on age when it occurred, not considered sexual assault in many states due to differences in statutory law, e.g., a 17-year-old with an 18-year-old legal |
| 27. When you were a child, did you SEE a parent get pushed, slapped, hit, punched, or beat up by another parent, or their boyfriend or girlfriend?                                                                                             | Witnessing and Indirect Victimization | Modified (changed “parent” and “another parent, or their boyfriend or girlfriend” to a “grownup in your household” and “another grown-up in your household”) | To generalize to any grown-up living in the household and not restrict to parents or significant others                                                        |
| 28. When you were a child, did you SEE a parent hit, beat, kick, or physically hurt your brothers or sisters, not including a spanking on the bottom?                                                                                          | Witnessing and Indirect Victimization | Modified (changed “parent” to “grown-up member of your household” and added “that did not leave a mark or injury” to the end)                                | To generalize to any grown-up living in the household and not restrict to parents; to make consistent with legal physical abuse definition in the state        |
| 29. When you were a child, in real life, did you SEE anyone get attacked on purpose WITH a stick, rock, gun, knife, or other thing that would hurt? Somewhere like: at home, at school, at a store, in a car, on the street, or anywhere else? | Witnessing and Indirect Victimization | Deleted                                                                                                                                                      | Not relevant to the current study’s focus on interpersonal victimization                                                                                       |
| 30. When you were a child, in real life, did you SEE anyone get attacked or hit on purpose WITHOUT using a stick, rock, gun, knife, or something that would hurt?                                                                              | Witnessing and Indirect Victimization | Deleted                                                                                                                                                      | Not relevant to the current study’s focus on interpersonal victimization                                                                                       |

| 31. When you were a child, did anyone steal something from your house that belongs to your family or someone you live with? Things like a TV, stereo, car, or anything else?                                                                                                             | Witnessing and Indirect Victimization | Deleted                          | Not relevant to the current study's focus on interpersonal victimization |
|------------------------------------------------------------------------------------------------------------------------------------------------------------------------------------------------------------------------------------------------------------------------------------------|---------------------------------------|----------------------------------|--------------------------------------------------------------------------|
| 32. When you were a child, was anyone close to you murdered, like a friend, neighbor or someone in your family?                                                                                                                                                                          | Witnessing and Indirect Victimization | Deleted                          | Not relevant to the current study's focus on interpersonal victimization |
| 33. When you were a child, were you in any place in real life where you could see or hear people being shot, bombs going off, or street riots?                                                                                                                                           | Witnessing and Indirect Victimization | Deleted                          | Not relevant to the current study's focus on interpersonal victimization |
| 34. When you were a child, were you in the middle of a war where you could hear real fighting with guns or bombs?                                                                                                                                                                        | Witnessing and Indirect Victimization | Deleted                          | Not relevant to the current study's focus on interpersonal victimization |
| <i>Questions Added</i>                                                                                                                                                                                                                                                                   |                                       |                                  |                                                                          |
| Question                                                                                                                                                                                                                                                                                 | Category of Victimization             | Deleted/Added Modified/Unchanged | Reason                                                                   |
| 1. When you were a child i.e. age 0 to 17, did you often feel that no grown-ups in your family loved you or thought you were important or special and/or did you feel that your grown-up family members didn't look out for each other, feel close to each other, or support each other? | Child Maltreatment                    | Added                            | To assess for emotional neglect                                          |
| 2. When you were a child, was there a time when a grown-up member of your household (for example, a parent, step-parent, an adult relative, your parent's boyfriend or girlfriend) was arguing                                                                                           | Witnessing and Indirect Victimization | Added                            | To assess for witnessing verbal DV                                       |

|                                                                                                                                                                                                                                                                                                                                 |                                 |              |                                                                                                                             |
|---------------------------------------------------------------------------------------------------------------------------------------------------------------------------------------------------------------------------------------------------------------------------------------------------------------------------------|---------------------------------|--------------|-----------------------------------------------------------------------------------------------------------------------------|
| <p>with, yelling at, and angry at another grown-up family member a lot of the time?</p>                                                                                                                                                                                                                                         | <p>Sexual<br/>Victimization</p> | <p>Added</p> | <p>Suggested from meeting with individuals who provide services for victims to include sexual exploitation/prostitution</p> |
| <p>3. When you were a child, was there a time when a grown-up member of your household (for example, a parent, step-parent, an adult relative, your parent's boyfriend or girlfriend) made you perform sex acts or do other things that you did not want to for their benefit (i.e. for money or to please another person)?</p> |                                 |              |                                                                                                                             |
| <p>4. When you were a child, did other kids, your siblings or a girlfriend or boyfriend write or post bad or embarrassing things about you or harass or threaten you over the internet e.g. through email, on social media like Facebook or Twitter or in online chat forums?</p>                                               | <p>Peer<br/>Victimization</p>   | <p>Added</p> | <p>Suggested from meeting with individuals who provide services for victims to include cyberbullying</p>                    |
|                                                                                                                                                                                                                                                                                                                                 |                                 |              |                                                                                                                             |

---

## Appendix B

Table B1: Summary of Items included on the Adult Victimization Measure

| Original Question                                                                                                                                                                                                                                                      | Modifications/Additions                                                                                                                                                                                                               |
|------------------------------------------------------------------------------------------------------------------------------------------------------------------------------------------------------------------------------------------------------------------------|---------------------------------------------------------------------------------------------------------------------------------------------------------------------------------------------------------------------------------------|
| <i>Dating Violence (Composite Abuse Scale)</i>                                                                                                                                                                                                                         |                                                                                                                                                                                                                                       |
| Kept me from medical care                                                                                                                                                                                                                                              | N/A                                                                                                                                                                                                                                   |
| Followed me                                                                                                                                                                                                                                                            | N/A                                                                                                                                                                                                                                   |
| Tried to turn my family, friends, and children against me                                                                                                                                                                                                              | N/A                                                                                                                                                                                                                                   |
| Slapped me                                                                                                                                                                                                                                                             | N/A                                                                                                                                                                                                                                   |
| Raped me                                                                                                                                                                                                                                                               | Changed to “Made me have sex with them (including vaginal, oral and anal sex) without my consent”                                                                                                                                     |
| Hung around outside my house                                                                                                                                                                                                                                           | N/A                                                                                                                                                                                                                                   |
| Harassed me over the telephone                                                                                                                                                                                                                                         | N/A                                                                                                                                                                                                                                   |
| Pushed, grabbed or shoved me                                                                                                                                                                                                                                           | N/A                                                                                                                                                                                                                                   |
| Used a knife or gun or other weapon                                                                                                                                                                                                                                    | N/A                                                                                                                                                                                                                                   |
| Told me that no one would ever want me                                                                                                                                                                                                                                 | N/A                                                                                                                                                                                                                                   |
| Exploited me e.g. forced me to perform sex acts or other things I did not want to for other people for their benefit (i.e. for money or to please another person)                                                                                                      | Added                                                                                                                                                                                                                                 |
| Wrote bad or embarrassing things about me or harassed me over the internet e.g. email or on social media?                                                                                                                                                              | Added                                                                                                                                                                                                                                 |
| <i>Sexual Assault (Sexual Experiences Survey-Short Form Victimization)</i>                                                                                                                                                                                             |                                                                                                                                                                                                                                       |
| Someone fondled, kissed, or rubbed up against the private areas of my body (lips, breast/chest, crotch or butt) or removed some of my clothes without my consent ( <i>but did not attempt sexual penetration</i> ) by: [various methods of coercion listed as options] | Removed follow up questions about specific method(s) of coercion                                                                                                                                                                      |
| Someone had oral sex with me or made me have oral sex with them without my consent by: [various methods of coercion listed as options]                                                                                                                                 | Removed follow up questions about specific method(s) of coercion                                                                                                                                                                      |
| A man put his penis into my vagina, or someone inserted fingers or objects without my consent by: [various methods of coercion listed as options]                                                                                                                      | Gender specifier “A man” changed to “Someone” and questions combined to “Someone has inserted their penis, fingers, or object(s) into my vagina or into my butt...”; removed follow up questions about specific method(s) of coercion |
| A man put his penis into my butt, or someone inserted fingers or objects without my consent by: [various methods of coercion listed as options]                                                                                                                        |                                                                                                                                                                                                                                       |
| Even though it didn’t happen, someone TRIED to have oral sex with me, or make me have oral sex with them without                                                                                                                                                       | Removed follow up questions about specific method(s) of                                                                                                                                                                               |



|                                                                                                                                                                                                                                                                                                                                                                                                                                                      |                                                                                                                                                                                                                                                     |
|------------------------------------------------------------------------------------------------------------------------------------------------------------------------------------------------------------------------------------------------------------------------------------------------------------------------------------------------------------------------------------------------------------------------------------------------------|-----------------------------------------------------------------------------------------------------------------------------------------------------------------------------------------------------------------------------------------------------|
| my consent by: [various methods of coercion listed as options]                                                                                                                                                                                                                                                                                                                                                                                       | coercion                                                                                                                                                                                                                                            |
| Even though it didn't happen, a man TRIED to put his penis into my vagina, or someone tried to stick in fingers or objects without my consent by: [various methods of coercion listed as options]                                                                                                                                                                                                                                                    | Gender specifier "A man" changed to "Someone"; questions combined to "Someone TRIED to insert their penis, fingers, or object(s) into my vagina or into my butt..."; follow up questions about specific method(s) of coercion removed               |
| Even though it didn't happen, a man TRIED to put his penis into my butt, or someone tried to stick in objects or fingers without my consent by: [various methods of coercion listed as options]                                                                                                                                                                                                                                                      |                                                                                                                                                                                                                                                     |
| <i>Harassment (National Violence Against Women Survey)</i>                                                                                                                                                                                                                                                                                                                                                                                           |                                                                                                                                                                                                                                                     |
| [Has anyone ever]: Followed or spied on you?                                                                                                                                                                                                                                                                                                                                                                                                         | N/A                                                                                                                                                                                                                                                 |
| Sent you unsolicited letters or written correspondence?                                                                                                                                                                                                                                                                                                                                                                                              | N/A                                                                                                                                                                                                                                                 |
| Made unsolicited phone calls to you?                                                                                                                                                                                                                                                                                                                                                                                                                 | N/A                                                                                                                                                                                                                                                 |
| Stood outside your home, school, or workplace?                                                                                                                                                                                                                                                                                                                                                                                                       | N/A                                                                                                                                                                                                                                                 |
| Showed up at places you were even though he or she had no business being there?                                                                                                                                                                                                                                                                                                                                                                      | N/A                                                                                                                                                                                                                                                 |
| Left unwanted items for you to find?                                                                                                                                                                                                                                                                                                                                                                                                                 | N/A                                                                                                                                                                                                                                                 |
| Tried to communicate in other ways against your will?                                                                                                                                                                                                                                                                                                                                                                                                | N/A                                                                                                                                                                                                                                                 |
| Vandalized your property or destroyed something you loved?                                                                                                                                                                                                                                                                                                                                                                                           | N/A                                                                                                                                                                                                                                                 |
| Sent you unsolicited emails or messages over social media?                                                                                                                                                                                                                                                                                                                                                                                           | Added                                                                                                                                                                                                                                               |
| <i>Perceived Abusive Workplace Experiences (Richman, Flaherty, &amp; Rospenda, 1996)</i>                                                                                                                                                                                                                                                                                                                                                             |                                                                                                                                                                                                                                                     |
| I have experienced unwanted sexual advances                                                                                                                                                                                                                                                                                                                                                                                                          | N/A                                                                                                                                                                                                                                                 |
| I have experienced discomfort listening to sexual humor                                                                                                                                                                                                                                                                                                                                                                                              | N/A                                                                                                                                                                                                                                                 |
| I have experienced unfair treatment because of my gender                                                                                                                                                                                                                                                                                                                                                                                             | Added "/gender identity" at end                                                                                                                                                                                                                     |
| I have felt excluded from informal training or clinical setting discussions because of my gender                                                                                                                                                                                                                                                                                                                                                     | Added "/gender identity" at end                                                                                                                                                                                                                     |
| Negative comments have been made regarding my ethnic or racial background (even if purported as a joke)                                                                                                                                                                                                                                                                                                                                              | N/A                                                                                                                                                                                                                                                 |
| I have been sworn at                                                                                                                                                                                                                                                                                                                                                                                                                                 | N/A                                                                                                                                                                                                                                                 |
| I have been yelled at                                                                                                                                                                                                                                                                                                                                                                                                                                | N/A                                                                                                                                                                                                                                                 |
| I have been humiliated in front of others                                                                                                                                                                                                                                                                                                                                                                                                            | N/A                                                                                                                                                                                                                                                 |
| <i>Crime Victimization (National Crime Victimization Survey)</i>                                                                                                                                                                                                                                                                                                                                                                                     |                                                                                                                                                                                                                                                     |
| Was something belonging to YOU stolen, such as things that you carry, like luggage, a wallet, purse, briefcase, book; clothing, jewelry, or cellphone; bicycle or sports equipment; things in your home – like a TV, stereo, or tools; things outside your home such as a garden hose or lawn furniture; things belonging to children in the household; things from a vehicle, such as a package, groceries, camera, or CDs OR Did anyone ATTEMPT to | Eliminated "things outside your home such as a garden hose or lawn furniture; things belonging to children in the household"; "Did anyone ATTEMPT to steal anything belonging to you?" made a separate question and added "such as the items listed |

---

|                                                                                                                                                                                                                                                                                                                                                                                                                            |                                                                                                                                                                                                                                     |
|----------------------------------------------------------------------------------------------------------------------------------------------------------------------------------------------------------------------------------------------------------------------------------------------------------------------------------------------------------------------------------------------------------------------------|-------------------------------------------------------------------------------------------------------------------------------------------------------------------------------------------------------------------------------------|
| steal anything belonging to you?                                                                                                                                                                                                                                                                                                                                                                                           | in the previous question” to it                                                                                                                                                                                                     |
| Has anyone attacked or threatened you in any of these ways<br>– with any weapon, for instance, a gun or knife; with anything like a baseball bat, frying pan, scissors, or stick; by something thrown, such as a rock or bottle; include any grabbing, punching, or choking; any rape, attempted rape or other types of sexual attack; any face to face threats; OR any attack or threat or use of force by anyone at all? | Eliminated “any rape, attempted rape or other types of sexual attack,” separated remaining categories into 6 different questions (e.g., “with any weapon...” and “with anything like a baseball bat...” were 2 different questions) |
| Was something belonging to you vandalized, damaged or broken on purpose like a car, bike, windows to your home, phone, furniture or other valuable items?                                                                                                                                                                                                                                                                  | Added                                                                                                                                                                                                                               |
| Did anyone ATTEMPT to vandalize, damage or break any valuable items belonging to you on purpose?                                                                                                                                                                                                                                                                                                                           | Added                                                                                                                                                                                                                               |
| Did anyone ATTEMPT to attack or threaten you in any way?                                                                                                                                                                                                                                                                                                                                                                   | Added                                                                                                                                                                                                                               |

---
